# Supplementary material
Source: PubMed Central journal article supplement (PMC154216)
Supplement: nar_31_9_2289__1.pdf [file nar_31_9_2289__1.pdf]

Table1. Primers used to clone sequences surrounding the stop codons

| <b>Gene name</b> | <b>PCR primers</b> | <b>Sequence</b>               |
|------------------|--------------------|-------------------------------|
| <i>YAL019W</i>   | Fun1033            | CCATCTCGCAATGCAACACGTAAC      |
|                  | Fun1144            | GACACCCGACTATCTACAGTTGG       |
| <i>YAL021C</i>   | CCR2578            | CCATTGTTAGCAAGATTTGAATTTATG   |
|                  | CCR2695            | CCATTTTATAATGAGGTAGTGTACAG    |
| <i>YAL024C</i>   | LTE4582            | CCAGAAGAGATTAATGAACTATCC      |
|                  | LTE4684            | CCATCTGTATATTTTATATGCAAAG     |
| <i>YAR066W</i>   | YAR609             | CCATTGTCAAATGCTATTCTCAACGG    |
|                  | YAR710             | CCATCCATTGTCTAGGTTGATTTTAC    |
| <i>YCL006C</i>   | YCLc780            | AAACGCTTCCACGGGACATGGGTTC     |
|                  | YCLc856            | TTGAAACGAGACGCCGTCTACGGTTG    |
| <i>YCL014W</i>   | BUD4465            | CCACAGCATTCAAAGTTATTAGAAC     |
|                  | BUD4569            | CCACGAAATATCAGATGGAGAGCC      |
| <i>YCL022C</i>   | YCLc533            | CCATTCATGTCGTATTCCTGTGATATGCC |
|                  | YCLc612            | CCAATATGATGAGGATGATAGTAAGG    |
| <i>YCL074W</i>   | YCLw1371           | TGATGTTGATGAGATAAGTGGCTGG     |
|                  | YCLw1457           | TGATGTTGATGAGATAAGTGGCTGG     |
| <i>YDL037C</i>   | YDLc1928           | CATCAAGCGATGTAACCAGTTCAACC    |
|                  | YDLc2028           | CAAGTTGGGTCAACTGAAGTAGTCACAG  |
| <i>YDL050C</i>   | YDL828             | TTAAATTCCACCAAGACCGTACC       |
|                  | YDL920             | TGAATTGCAGGAGAACTTGGAAAGCC    |
| <i>YDR082W</i>   | STN1917            | CCAAACAGTGGAAATATTATTAC       |
|                  | STN2048            | CCAGTATCTTATTTTGAGCTCATCG     |
| <i>YDR275W</i>   | YDRw1170           | AGTCGTTTTGAAGTGGCTTGTGAG      |
|                  | YDRw1252           | TAGTTTCTTTCTGTAGCAATAAGTG     |
| <i>YDR509W</i>   | DRw795             | CATAAAGCACCTATAACTCTCAAC      |
|                  | DRw900             | CTTCCCCACCTCTTTGATGTTAG       |
| <i>YER039C-a</i> | YER189             | CCATGCACTGTGACGCTATGTATCC     |
|                  | YER292             | CCAGAGCAGCAAAGAAATGGAAAC      |
| <i>YER109C</i>   | FLO721             | CCAGTCGACGGACCCAAATCTAAAG     |
|                  | FLO858             | CCATCTGGAAGAACTGGTATTAAAG     |
| <i>YFL052W</i>   | YFLw1857           | TCGACAGATGGTTCTAAAGAAGATG     |
|                  | YFLw1946           | TGCTATTAGCCTCTTCAACTGTCCG     |
| <i>YGL241W</i>   | YGL3397            | CCATGTATTTACGAGACTCTATCCG     |
|                  | YGL3498            | CCATTTACATCTGATATCTCCACG      |
| <i>YGR037C</i>   | ACB705             | GATGCCGAAAAGGAATACATTGC       |
|                  | ACB815             | ACAAGGAAAGCTAGGCCAAAACCTCC    |

|                |          |                                   |
|----------------|----------|-----------------------------------|
| <i>YGR046W</i> | YGRw1605 | AAGTCAATTAAGTATGCTTGGGC           |
|                | YGRw1699 | CGAAAGAGATGAAAGGACGATAAAAC        |
| <i>YGR096W</i> | YGRw1001 | CCATGGGGGTATGAAACTGCCATCC         |
|                | YGRw1091 | CCAAGAATATAAGATATGATGATTTTCG      |
| <i>YHL006C</i> | YHLc912  | CTGCCCCGGCTATTGCGATTCTGG          |
|                | YHLc1051 | GCCGTGTTTCGGGCCACGAGGCG           |
| <i>YHR058C</i> | YHRc52   | CCATTGGACAAATTAATGGTCACAAGC       |
|                | YHRc148  | CCAAACCTGAAAAGTTGATTTTCGCGGGG     |
| <i>YHR148W</i> | HRw1008  | TTGTTGAGATACAGAAACCAAATCG         |
|                | HRw1102  | TCGTAATAATTTTCACAATGTAGG          |
| <i>YHR155W</i> | YHRW4149 | TTTGCAGAGTACAACAGATTATC           |
|                | YHRW4230 | CACCCATTCTATTAGACAAGACGG          |
| <i>YHR214W</i> | YHR1211  | CCATTGTCAAATGCTATTCTCAACGG        |
|                | YHR1293  | CCATCCATTGTCTAGGTTGATTTTCAC       |
| <i>YIL023C</i> | YILc1497 | ATTTTTGTAGGATTTGCCGTTATGG         |
|                | YILc1577 | AAGGCAACAAGGATATTTACTATAAAGG      |
| <i>YIR044C</i> | YIRc954  | CCAAAGTCTTTAGCGTTTCGCATCTGG       |
|                | YIRc1037 | CCAAAGAAGTGAAACTATAAATTGG         |
| <i>YJL028W</i> | YJ1296   | CCAATCATATCGCTATCGCAACGGGCATGG    |
|                | YJ1381   | CCATCGACTTCGGCTTCCTATGCAGAACG     |
| <i>YJL075C</i> | YJL797   | CCATCAGATAATGAACTCAAAG            |
|                | YJL899   | CCAGTCGTCTCCTCCGTCAG              |
| <i>YJL162C</i> | Yj1162w  | GCAAAATTCAAACCGTTACTAG            |
|                | Yj1162c  | CAATGTTTCAAGGTCAGCCAC             |
| <i>YJL169W</i> | YJL1322  | CCAAGGATTTTTCACGATGTCTTTAGC       |
|                | YJL1405  | CCACTTTGCATCTTTTGTACCCAAC         |
| <i>YJL170C</i> | YJLc1011 | CTCATAATATTTGTAGTTCTCCTATG        |
|                | YJLc1094 | CAAAAATGGGAAATGGAGGCTGTGG         |
| <i>YJL217W</i> | YJLw1041 | TTCTCGGAATGGAGTCTCACAGC           |
|                | YJLw1122 | GTTCTTAACAAAAGCAAACCCCTC          |
| <i>YJR116W</i> | YJRw1302 | AAACTTGCAAAACCAGCCCCAACGTC        |
|                | YJRw1390 | TGTATGTATGTATGTAGATGTATGTG        |
| <i>YKL020C</i> | SPT3517  | CCACGAGTCAATTAAGACATTTTTCTAGCTGG  |
|                | SPT3544  | CCAGCTAGAAAAATGTCTTTAATTGACTCGTGG |
| <i>YKL031W</i> | YKL866   | CCATTTGGTATCATATTTTGTTTTG         |
|                | YKL970   | CCAATAATAAAAACAATAACAAC           |
| <i>YKR089C</i> | YKRc3195 | TCAACGCAGCACAAAAGCACCACCAG        |
|                | YKRc3298 | AAAATGATATGAATGAGAAAGGC           |

|                |          |                               |
|----------------|----------|-------------------------------|
| <i>YKR103W</i> | YKR4327  | CCATTTAGTTCTTCTGTAATGATC      |
|                | YKR4434  | CCATTGAGCAGTTTCAGTAAAGG       |
| <i>YLR465C</i> | YLRc16   | ACTGATATACCATCAGAAGAAGGTACC   |
|                | YLRc73   | TCTGTACCACGAAGTAGCGCAGGAAAC   |
| <i>YMR057C</i> | YMR605   | CCATCTCGCAGAAGACCATTTATTGG    |
|                | YMR704   | CCAGCCTTCTTTGCGATAATGCC       |
| <i>YMR273C</i> | YMRc3189 | TACATGGAGCAGGTAGCCCACGAC      |
|                | YMRc3281 | TTTTTCGTGTATGTACGTGTGATGTG    |
| <i>YNL091W</i> | YNL4164  | CCTCATACTCCACAAGGGCTAG        |
|                | YNL4280  | CATACATACATAATTCGACGAAAT      |
| <i>YNL235C</i> | YNLc1401 | CCAAGTTTATCTGTATCAATAATTAATC  |
|                | YNLc1485 | CCAAGATACAAGTGGCTTGAAAATATC   |
| <i>YNL269W</i> | YNLw861  | AAAATAGTCATTATATACGTAGTGC     |
|                | YNLw960  | GTGAGTTTTCCCTGCTGGAGGAGC      |
| <i>YNL305C</i> | YNLc1350 | TTGTCTATTTTAAGGATTTTGGC       |
|                | YNLc1439 | ATAAACTATGTAAAAGAAGAAG        |
| <i>YNR014W</i> | YNRw765  | CCATTTGACAAACCATTGTATGAGAG    |
|                | YNRw847  | CCATGTATGTATAGAGGAGGGATGGG    |
| <i>YNR068C</i> | YN1840   | CCAGTAGCTGGAAATACTGAAAACGG    |
|                | YN1948   | CCAACCTGTGTTGAAGAGAGATGC      |
| <i>YOL137W</i> | YOLw1953 | TTGTATCCTAAATTCATAAAAGGG      |
|                | YOLw2035 | CAACAGCTTTATTTTTTCTAATTTTGG   |
| <i>YOR024W</i> | YOR183   | CCATATATAACACAAGCAAGG         |
|                | YOR272   | CCATTTTGAGAAAGATGGATCTAG      |
| <i>YOR030W</i> | YOR2644  | CCAACCAACCACATTTATAATTACG     |
|                | YOR2755  | CCAATAAATGACCACAAGAAATAAAGG   |
| <i>YOR051C</i> | YORc1290 | CCACATGGTAAATTTCAAGATGTCCTGG  |
|                | YORc1369 | CCATTGAGAGTACTTAAGGCAACAGAAGG |
| <i>YOR158W</i> | YOw1063  | CCAACCTCTAATGGAGCTGGAAATAATGG |
|                | YOw1163  | CCATAGTTGTAATGCGTCTAAGGCAC    |
| <i>YOR178C</i> | GAC2932  | AGTTCATCTCCACCCATCCTTTCC      |
|                | GAC2938  | GTTAACGAAGTAGTAACTTGATG       |
| <i>YOR268C</i> | YORc852  | ATCCATGAATCACAAACACAAGCC      |
|                | YORc932  | GAAAGGAAAATAAAGAAAGGCTACG     |
| <i>YOR324C</i> | YORc2250 | TTGATGGGCGGCTTTATCGTTTACG     |
|                | YORc2345 | CAGAGGTGATTTTATCTTTGTACGC     |
| <i>YOR332W</i> | VMA1595  | CCAGCCATCAGATTGGAATTGTATG     |
|                | VMA1699  | CCATGTTAGGAGTGTATATGTAAGTATG  |

|                |          |                            |
|----------------|----------|----------------------------|
| <i>YPL076W</i> | YPL1234  | CCAGATCTACTAAGTACATGGGATGC |
|                | YPL1313  | CCACAGAAGTCGTACCCCTCCCTTGC |
| <i>YPR003C</i> | YPR2712  | AATGATTTCGGAGAGTTTTATGTCC  |
|                | YPR2825  | GCATTATGAAATTTATTCCTTGCGG  |
| <i>YPR143W</i> | YPRw1217 | TTAGTTAAAGCTGCCGCAGGAAG    |
|                | YPRw1302 | CTTGACATAGACTAAATAATATAC   |
| <i>YPR158W</i> | YPRw1215 | AGTATCATCAAAAAGGAAGTATCTAG |
|                | YPRw1302 | AGTAGAAAGCCTTACAGGGTGACAC  |

---
