# Supplementary material
Source: PubMed Central journal article supplement (PMC154216)
Supplement: nar_31_9_2289__2.pdf [file nar_31_9_2289__2.pdf]

Table 2. Primers used for RT-PCR

| <b>Gene name</b> | <b>PCR primers</b> | <b>Sequence</b>           |
|------------------|--------------------|---------------------------|
| <i>BSC1</i>      | YDLc1814           | TCACATACTTCATCAAGCGTAGCCG |
|                  | YDLc2672           | TGCCGATGTTGTTACTTGGACCAGC |
| <i>BSC2</i>      | YDRw899            | GGAAATAGTTATTGATGAGGAG    |
|                  | YDRw1397           | TTTACCTGTGTTGTAGAGTTCC    |
| <i>IMP3</i>      | HRw718             | AACATGAGCAATTATTACTGGAC   |
|                  | HRw1263            | ATATTTACAAATGACGCCGATG    |
| <i>BSC3</i>      | YLRc818            | GTCAATTCCTCGCTTCGGTTCTCTG |
|                  | YLRc1102           | AAGACTCAGAAAAACACTAGATGCC |
| <i>ZDS1</i>      | YMRc3085           | GGCTGAGTCACTTGAAATTGAG    |
|                  | YMRc3546           | TGTCACACGTCAGTAAATCCGC    |
| <i>BSC4</i>      | YNLw690            | ACATTCGCCCAACTTATCACTCG   |
|                  | YNLw1190           | AATTGTGATCATCGACTATTTGC   |
| <i>BSC5</i>      | YN1746             | GAGCGAGCGATTCCCATTCATAAGG |
|                  | YN2617             | ATAGGAGAAGAAGCAACAGGCACAC |
| <i>BSC6</i>      | YOLw1684           | GCTCAGTTTTTCATTTTCGTCGTG  |
|                  | YOLw2170           | ATCTATTTTAAACGACCAAGAGTG  |
